# Supplementary material for: Photo–Redox Properties of –SO3H Functionalized Metal-Free g-C3N4 and Its Application in the Photooxidation of Sunset Yellow FCF and Photoreduction of Cr (VI)
Source: MDPI journal article supplement (doi:10.3390/catal12070751), 2022-07-07
Supplement: s1 [file s1]

Supporting information

# Photo–Redox Properties of $-\text{SO}_3\text{H}$ Functionalized Metal-Free $\text{g-C}_3\text{N}_4$ and Its Application in the Photooxidation of Sunset Yellow FCF and Photoreduction of Cr (VI)

Harikrishnan Venkatesvaran <sup>1</sup>, Sridharan Balu <sup>1,2</sup>, Anuradha Chowdhury <sup>1</sup>, Shih-Wen Chen <sup>1,2</sup>  
and Thomas C.-K. Yang <sup>1,2,\*</sup>

<sup>1</sup> Department of Chemical Engineering and Biotechnology, National Taipei University of Technology, Taipei 106, Taiwan; harikrishnan.osv@gmail.com (H.V.); bsridharanbsc.12@gmail.com (S.B.); anuradhachowdhary24@gmail.com (A.C.); shihwen@mail.ntut.edu.tw (S.-W.C.)

<sup>2</sup> Precision Analysis and Materials Research Centre, National Taipei University of Technology, Taipei 106, Taiwan

\* Correspondence: ckyang@mail.ntut.edu.tw

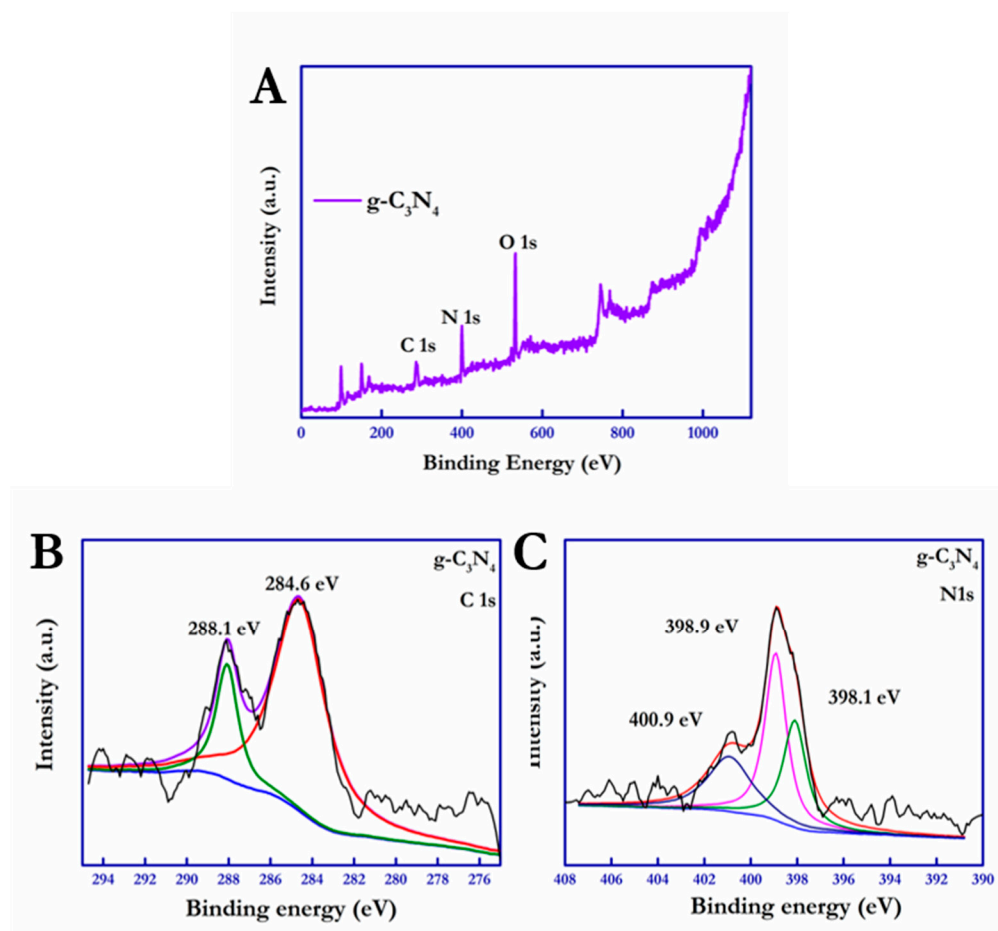

**Figure S1.** Complete XPS survey spectra of prepared g-C<sub>3</sub>N<sub>4</sub> (A) and individual deconvoluted C1s and N1s (B & C) spectra of g-C<sub>3</sub>N<sub>4</sub>.

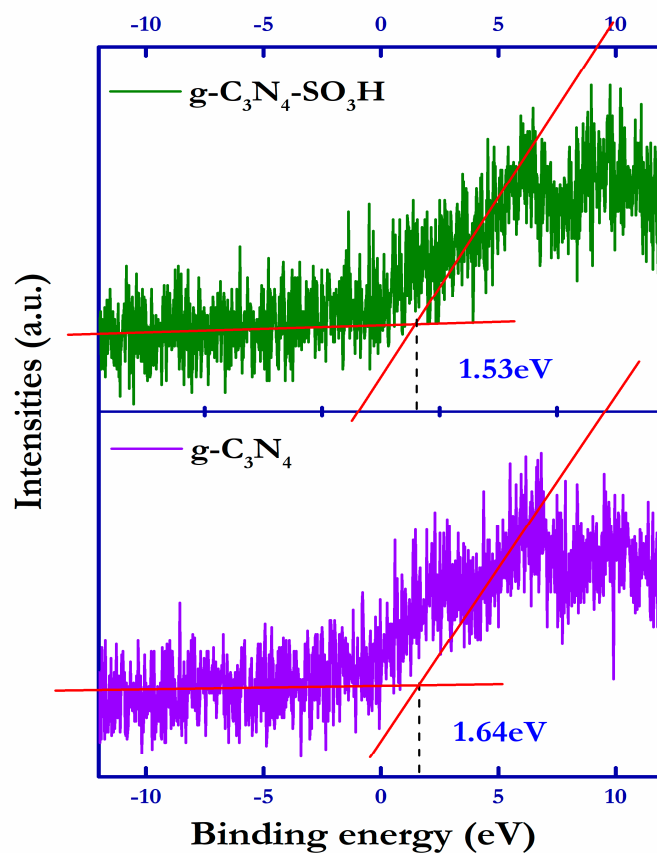

**Figure S2.** Valence bond x-ray photoelectron spectroscopy (VB-XPS) survey spectra of prepared g-C<sub>3</sub>N<sub>4</sub> and g-C<sub>3</sub>N<sub>4</sub>-SO<sub>3</sub>H.

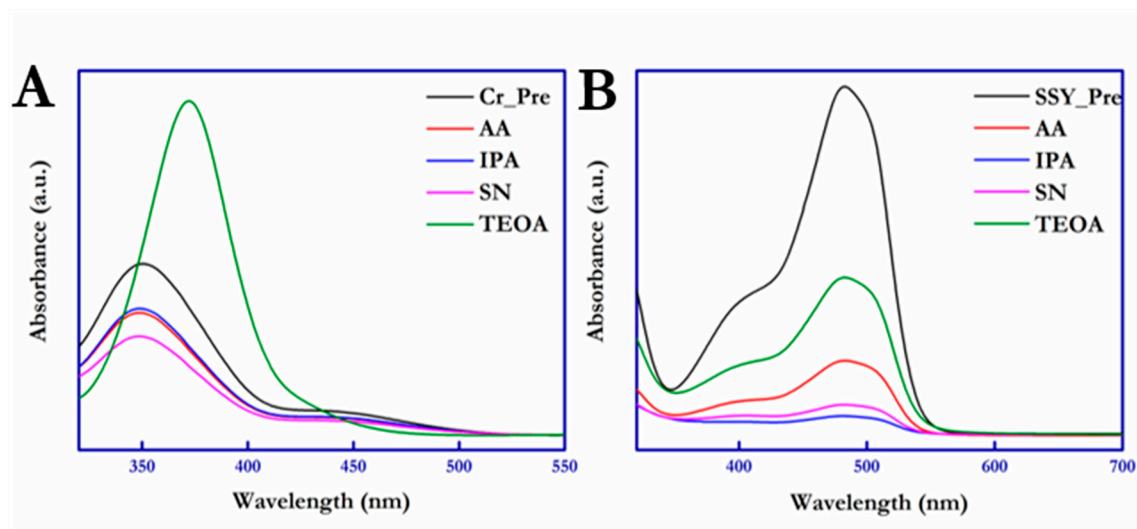

**Figure S3.** Photocatalytic reduction of Cr (VI) (A) and oxidation of SSY (B) under the influence of distinct scavenging species.

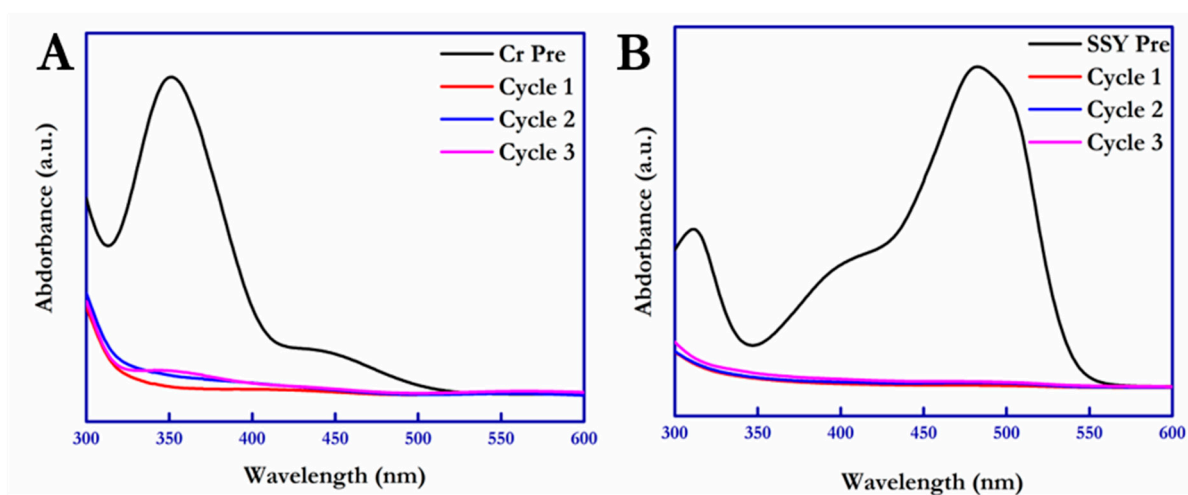

**Figure S4.** Degradation ability over repeatability of photocatalytic reduction of Cr (VI) (A) and photocatalytic oxidation of SSY (B) for 3 repeated cycles.
